# Supplementary material for: Armet/Manf and Creld2 are components of a specialized ER stress response provoked by inappropriate formation of disulphide bonds: implications for genetic skeletal diseases
Source: PubMed Central journal article supplement (PMC3842181; doi:10.1093/hmg/ddt383), 2013-08-15

**Supplemental Figure 1.** Armet and Creld2 are up-regulated in chondrocytes from new born and 5 day old V194D *Matn3* mice [mm] compared to wild type [wt] controls. Equal protein loading was confirmed by Ponceau staining.

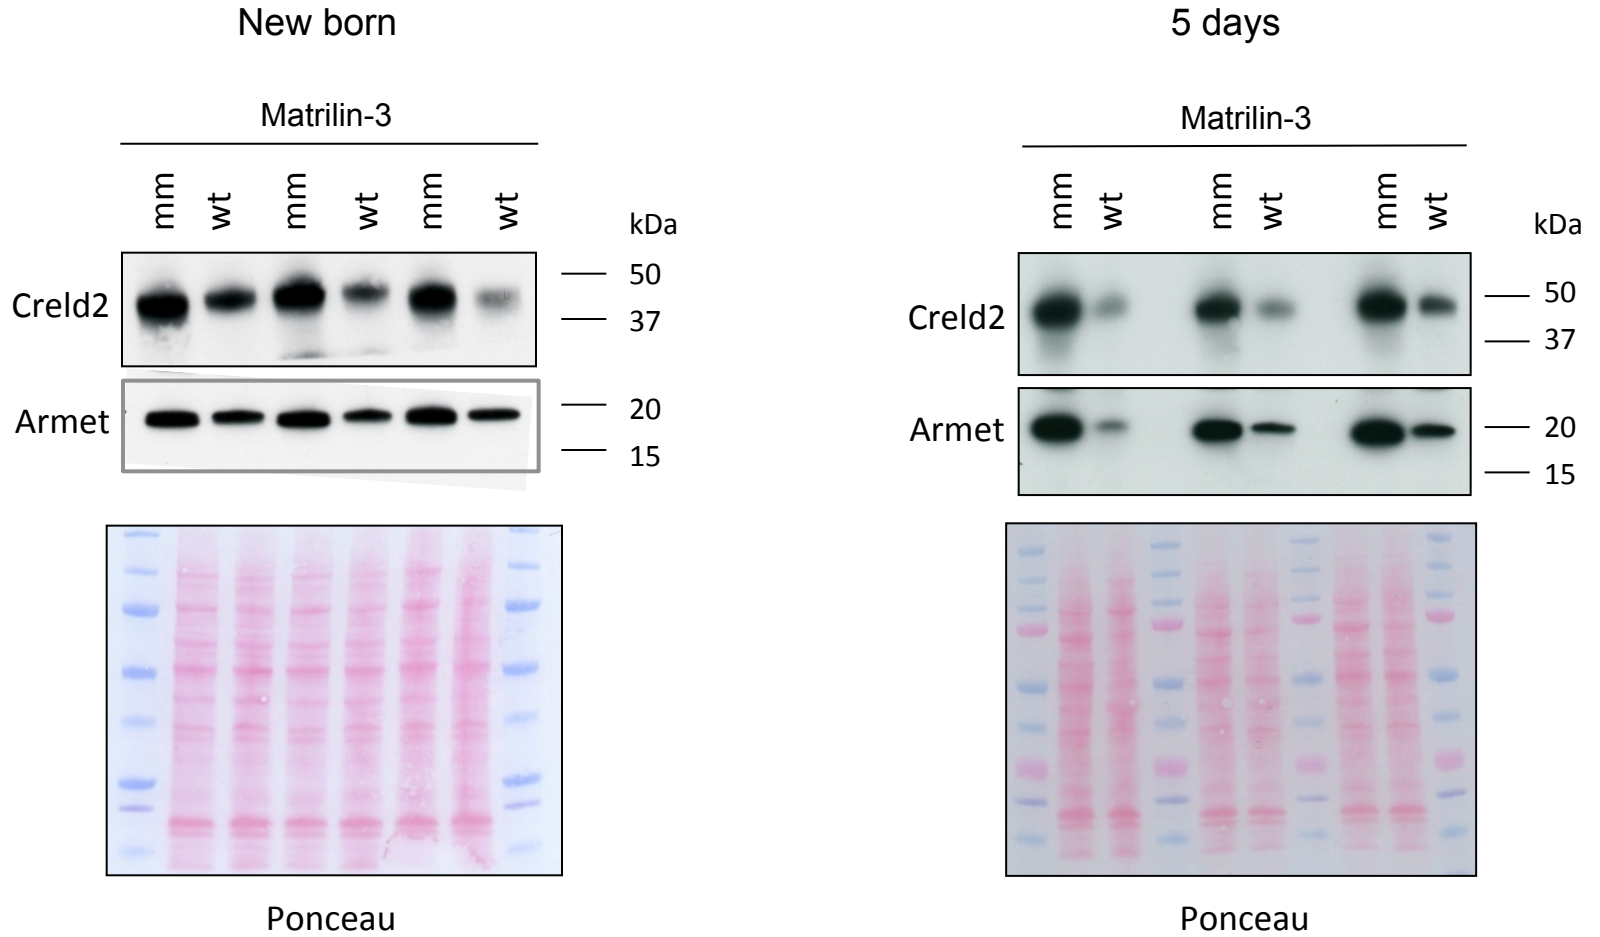

**Supplemental Figure 2.** Immunohistochemical localisation of ARMET and CRELD2 with V194D matrilin-3 in the cartilage growth plates and femoral heads of 1 week old mice. Key: wild type [WT] and *Matn3* V194D [mm] mice. Scale bar = 200µm.

Matrilin-3

ARMET

CRELD2

WT

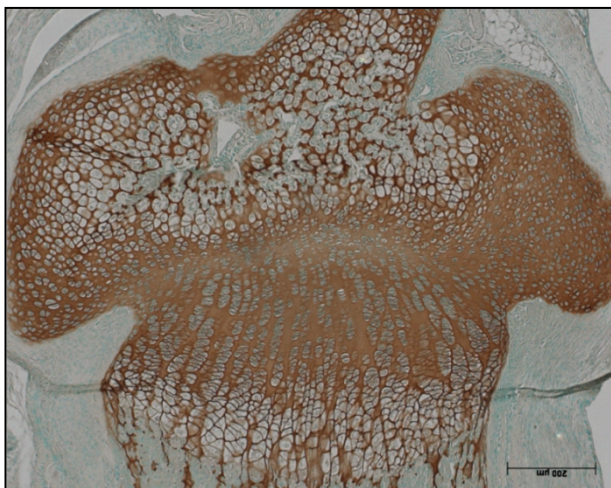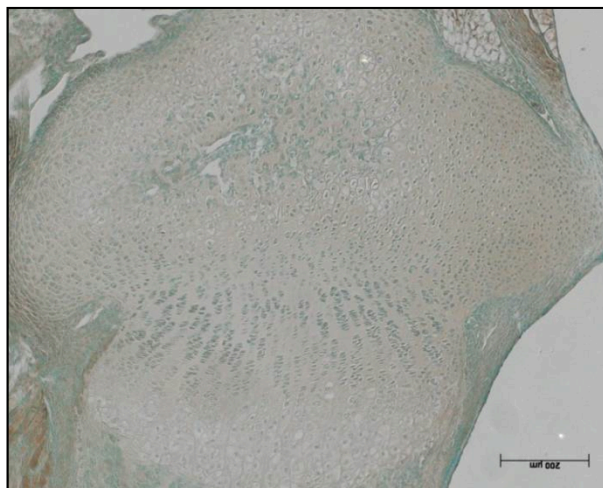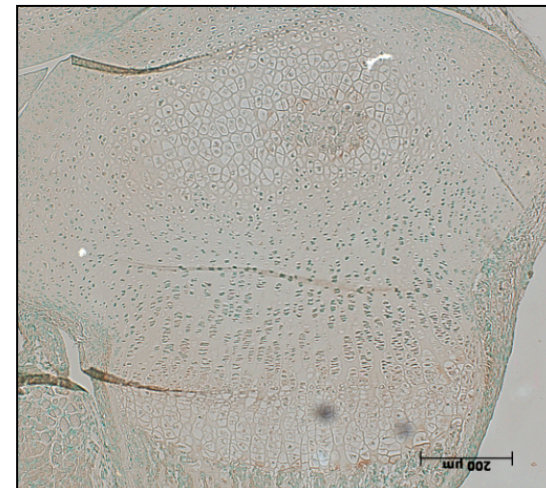

mm

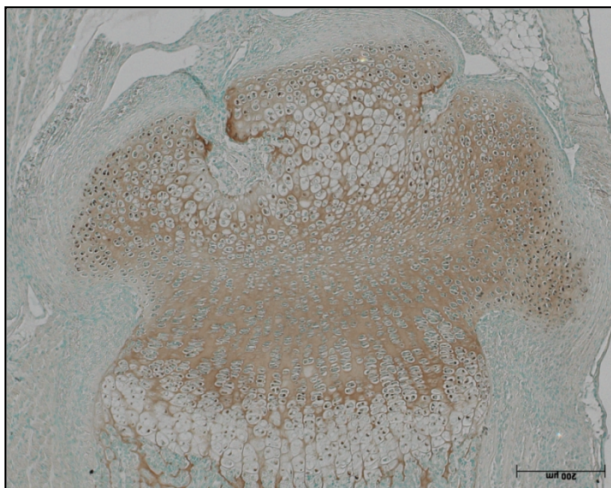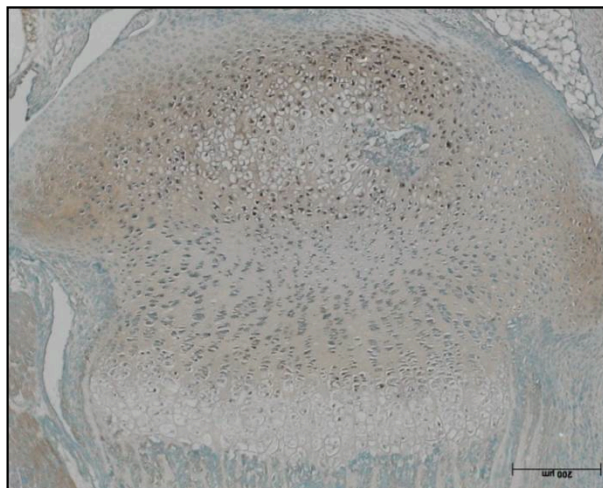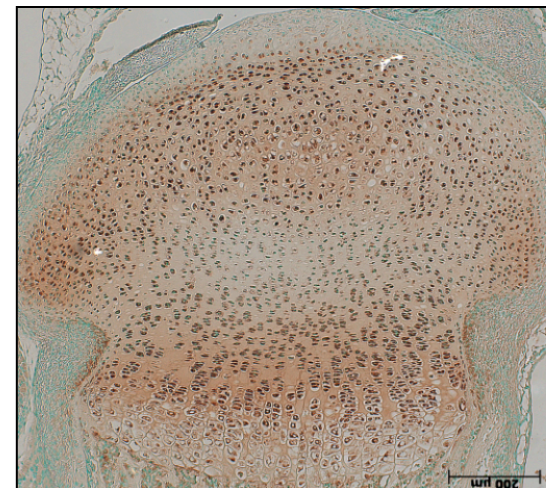

**Supplemental Figure 3.** IHC analysis of the tibia growth plate shows increased ARMET in the ECM and chondrocytes of *Matn 3* V194D mutant mice [mm] compared to wild type [WT] controls from birth. The different zones of the growth plate are indicated on the top right panel (VIF = vascular invasion front).

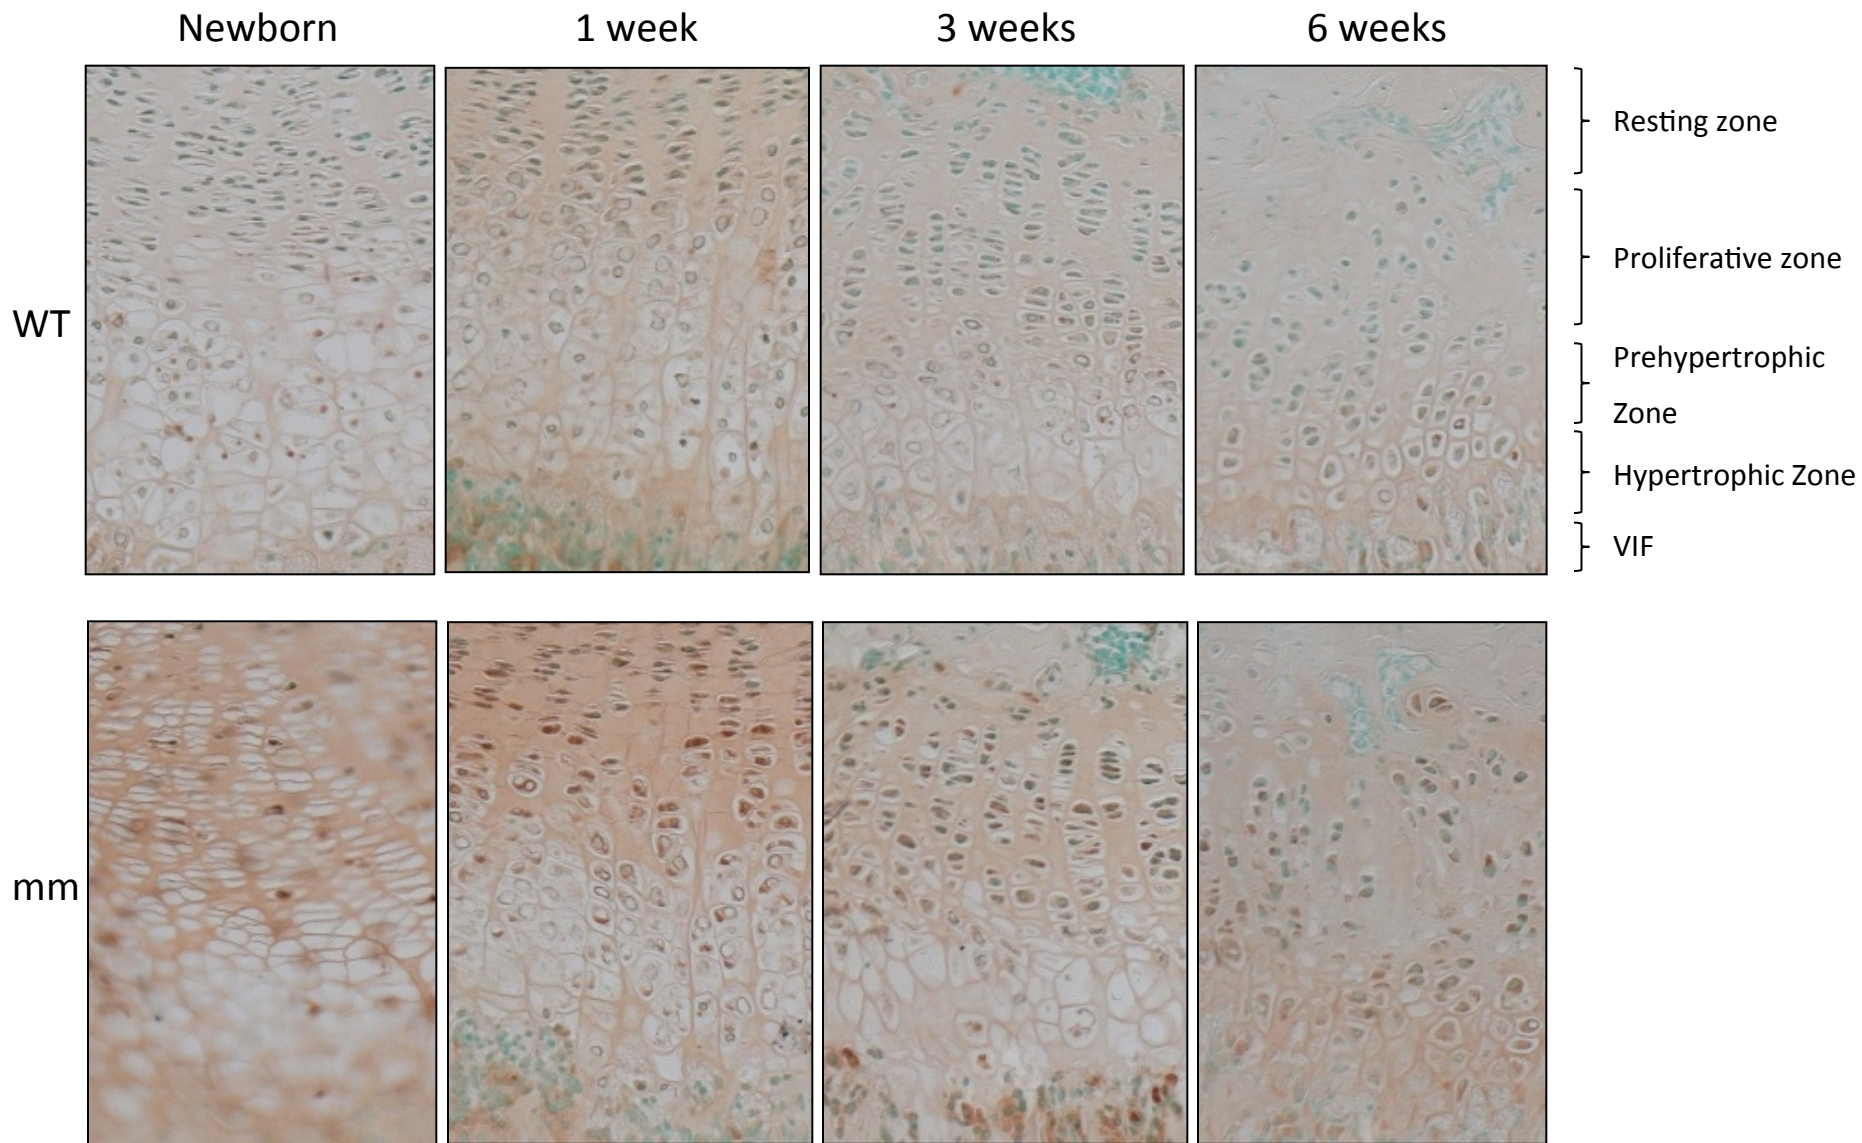

**Supplemental Figure 4.** IHC analysis of the tibia growth plate shows increased CRELD2 in the ECM and chondrocytes of *Matn3* V194D mutant mice [mm] compared to wild type [WT] controls from birth. The different zones of the growth plate are indicated on the top right panel (VIF = vascular invasion front).

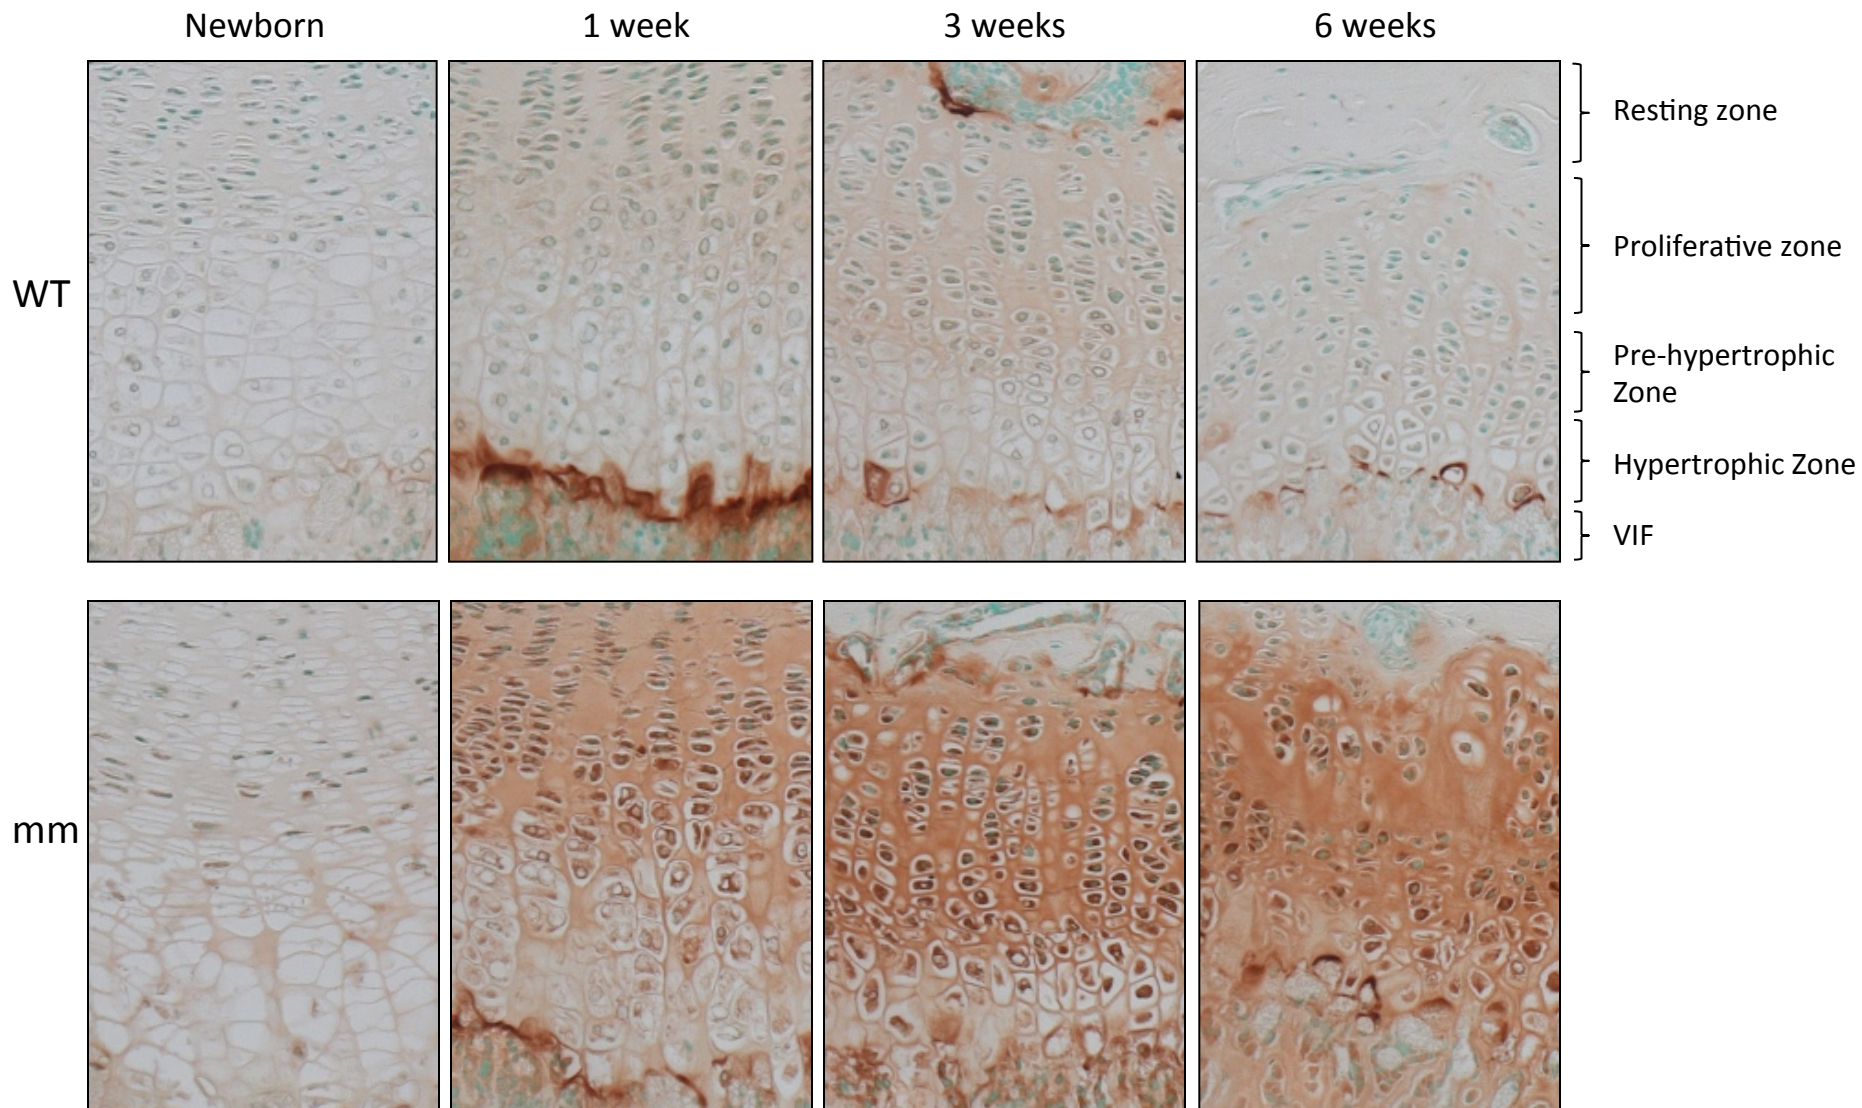

**Supplemental Figure 5.** There is no up-regulation of CRELD2 in *Comp* models of PSACH-MED (T585M and D469del) compared to *Matn3* V194D in the cartilage growth plates and femoral heads of 1 week old mice. Key: wild type [WT] and mutant [mm] mice. Scale bar = 200 $\mu$ m.

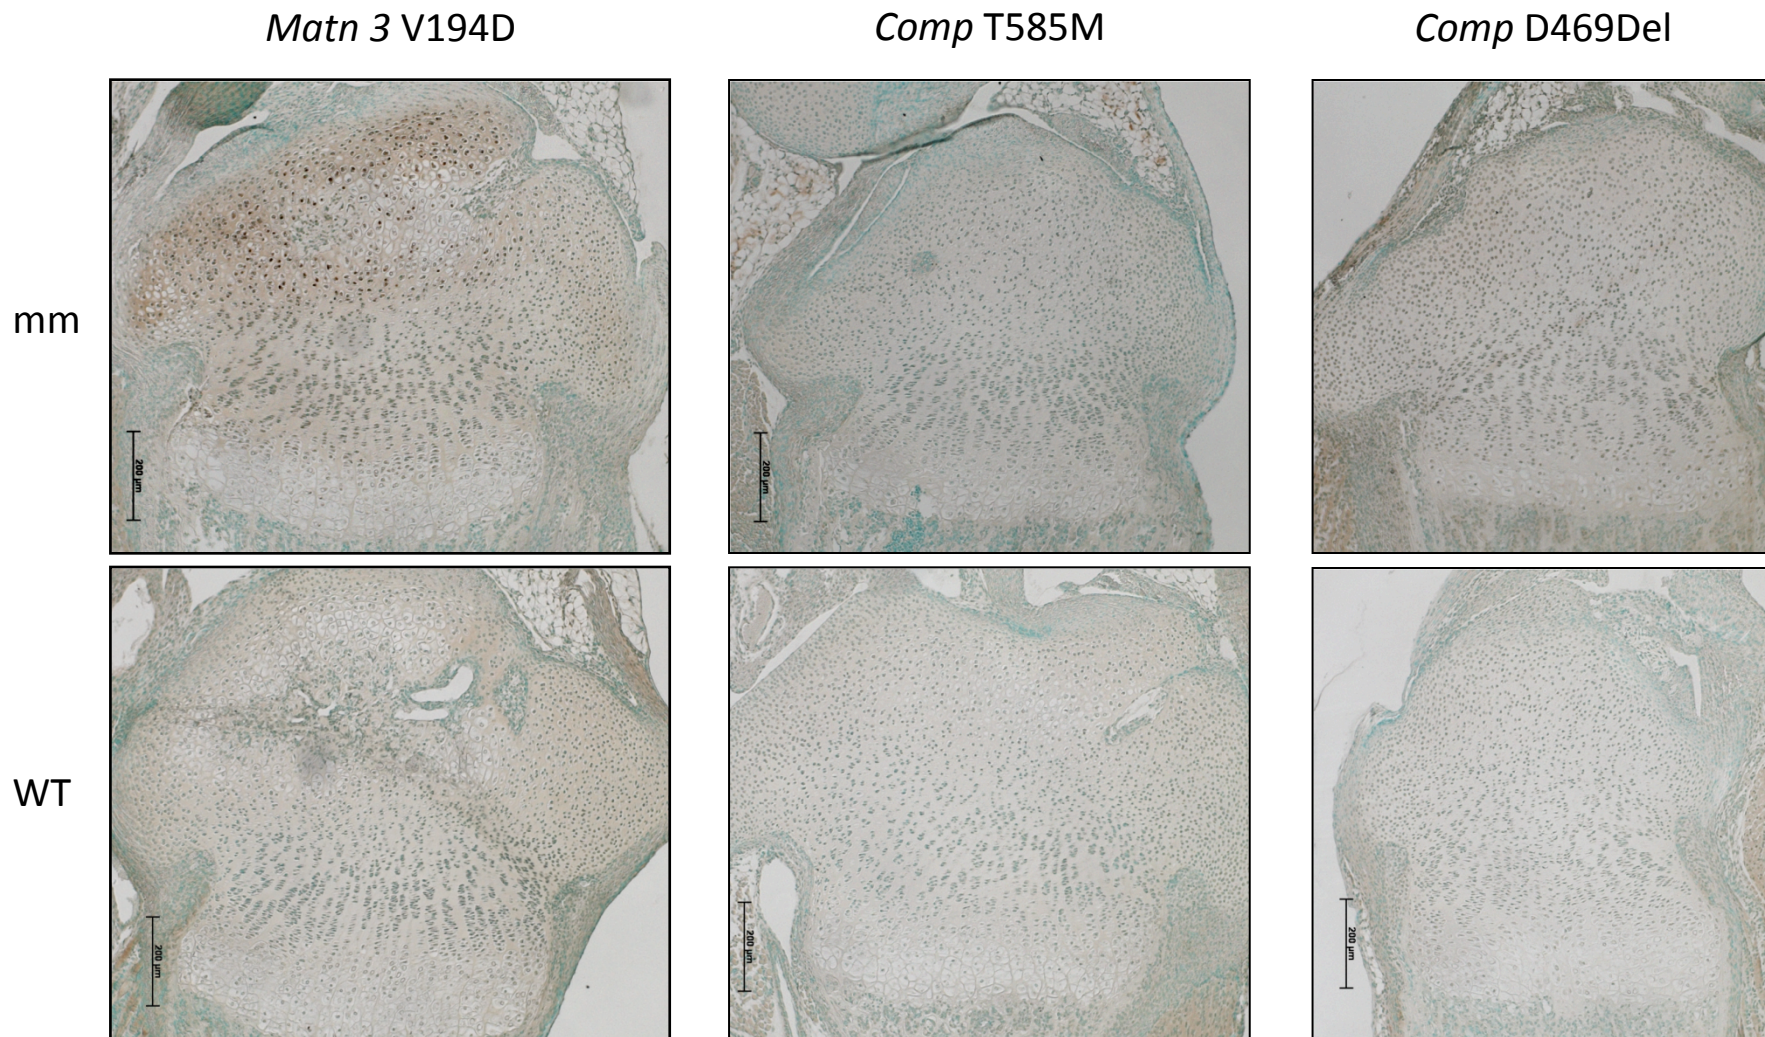

**Supplemental Figure 6.** CLUSTAL 2.1 multiple sequence alignment between PDI, ARMET and CRELD2. Numbering of amino acid residues is shown on the right with translational start codon (methionine) as 1. The potential CXXC motifs of CRELD2 and ARMET along with the known CXXC motif of PDI are indicated in green and the imperfect KDEL sequences in yellow. Key: \* = identical residue; : = conserved residue; . = semi-conserved residue.

```

ARMET          -MRRMWATQGLAVALALSVLPG-----SRALRPGDCEVQISYL 37
CRELD2        --MHLLLAAAFGLLLLLPPPGA-----VASRKPTMCQRQRTL 36
PDI           MLRRALLCLAVAALVRADAPEEDHVLVLRKSNFAEALAAHKYLLVEFYAPWCGHCKALA 60
                :      . . . :                               . * * :

ARMET          GRFYQD-----LKDRD----- 48
CRELD2        DKFNQG-----MANTARKNFGGGNTAW 58
PDI           PEYAKAAGKCLKAEGSEIRLAKVDATEESDLAQQYGVRYPTIKFFRNGDTASPKYTAGR 120
                .: :                               : :

ARMET          -----
CRELD2        EEKTLKSKYEFSEIRLLEIMEGLCDSSDFECNQLLEQQEEQLEAWWQTLKKEHPNLFWF 118
PDI           EADDIVNWLKKRTGPAATTLPDGAAAESLVESSEVAVIGFFKDVESDSAKQFLQAAEAID 180

ARMET          -VTFSPATIENELIKFCREARGKENRLCY-----YIGA 80
CRELD2        VHTLKACCLPGTYGPDQCQCQGGSERPCSGNGYCSGDGSRQGDGSCQCHTGYKGPLCIDC 178
PDI           DIPFGITSNSDVFSKYQLDKDGVVLFKFKFDEGRNFEGEVTKENLLDFIKHNQLPLVIEF 240
                .: . : * *

ARMET          TDDAATKII-----NEVSKPLAHHIPVEKICE----- 107
CRELD2        TDGFFSLQR-----NETHSICSACDESKTCS----- 205
PDI           TEQTAPKIFGGEIKTHILLFLPKSVSDYDGKLSNFKTAAESFKGKILFIFIDSDHTDNQR 300
                *: . : : :

ARMET          -----KLKKKDS-QICELKYDKQIDLSTVDLKKLRVKELKK-----I 143
CRELD2        -----GPSNKDC-IQCEVGWAR-VEDACVDVDECAAETSPCSDGQYCE-----NVNGSYT 253
PDI           ILEFFGLKKEECPAVRLITLLEEEMTKYKPESEELTAERITEFCHRFLEGKIKPHLMSQEL 360
                .: : . : : :

ARMET          LDDWGET-----CKGCAEK----- 157
CRELD2        CEDCDST-----CVGCTGKGPANCKECIAGYTKESG 284
PDI           PEDWDKQPVKVLVGKNFEDVAFDEKKNVFVEFYAPWCGHCQQLAPIWDKLGETYKDHENI 420
                :* . . * *

ARMET          -----
CRELD2        QCTDIDECLEEKACKRKNENCYNVPGSFVVCVCEGF-----E 322
PDI           VIAKMDSTANEVEAVKVHSFPTLKFPPASADRTVIDYNGERTLDGFKKFLESQGDGAGD 480

ARMET          ---SDYIRKINELMPKYAPKAASARTDL 182
CRELD2        ETEDACVQTAEGKVTEENPTQPPSREDL 350
PDI           DDDLEDELEEAEPDMEEDDDQKAVKDEL 508
                :. : : . : :*

```

**Supplemental Figure 7.** Substrate trapping mutants were generated by mutating the potential active sites from CXXC to CXXA and included engineered V5 tags and KDEL sequences at C-terminus. *In vitro* mutagenesis of the N- and C-terminal cysteines in both putative active CXXA sites of CRELD2 and ARMET was performed by PCR. For CRELD2 these were Cys32 and Cys264 and for ARMET Cys33 and Cys154.

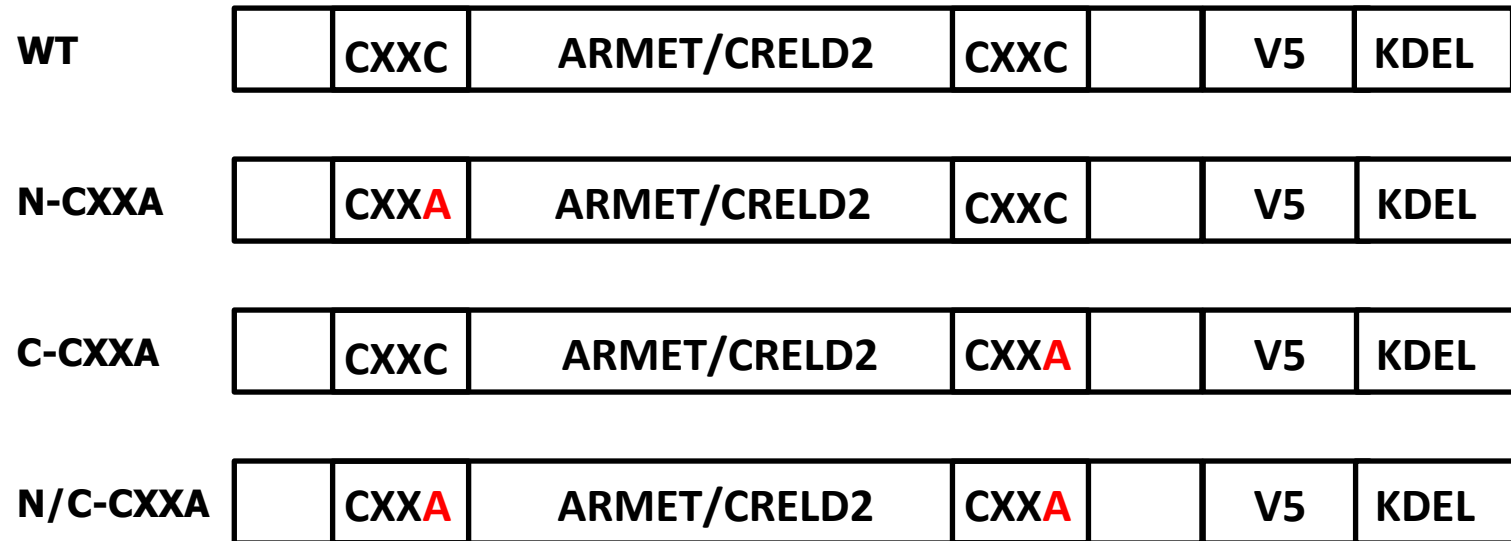

Supplement: supp_ddt383_ddt383supp.pdf [file supp_ddt383_ddt383supp.pdf]
